OCTOBER 2023 | VOLUME 180 | NUMBER 10

# The American Journal of Psychiatry

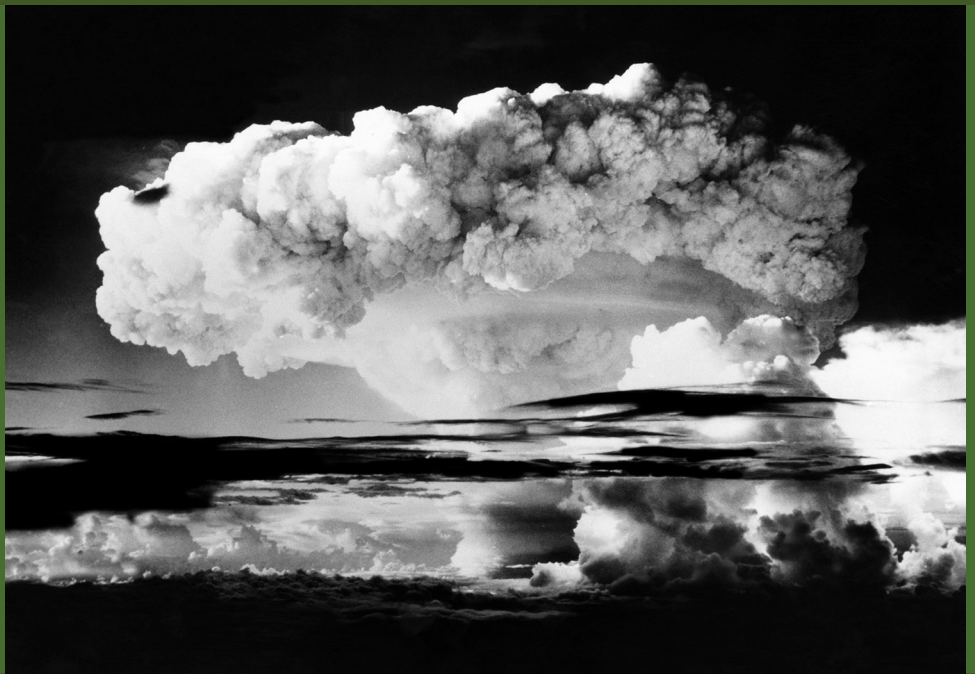

Reducing the Risks of Nuclear War:  
The Role of Health Professionals

Genetic Contribution to the Heterogeneity  
of Major Depressive Disorder

Networks of Neurodevelopmental Traits, Socioenvironmental  
Factors, Emotional Dysregulation in Childhood, and  
Depressive Symptoms Across Development

Maternal Perinatal Stress Trajectories and Negative  
Affect and Amygdala Development in Offspring

AMERICAN  
**PSYCHIATRIC**  
ASSOCIATION 

[ajp.psychiatryonline.org](http://ajp.psychiatryonline.org)
