# Bringing Psychiatrists & Mental Health Professionals Together to Connect, Collaborate & Influence Systems-level change.

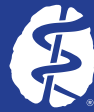

AMERICAN  
PSYCHIATRIC  
ASSOCIATION

THE  
MENTAL  
HEALTH  
SERVICES  
CONFERENCE

Oct. 12-14, 2023  
Washington, D.C.

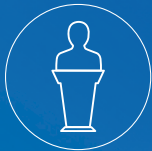

40+  
Sessions

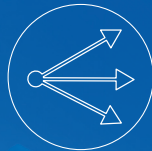

50+  
Topics

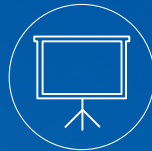

Poster Hall &  
Exhibit Gallery

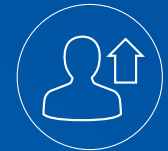

Up to  
17.5 CME\*

The 2023 Mental Health Services Conference will bring psychiatrists and mental health professionals together to collaborate on practical advice to influence systems-level change for their patients. Held in-person in Washington, D.C. at the Capital Hilton Hotel, join us October 12 through 14 as we work together to develop interdisciplinary practical solutions to solve real-world issues.

Not only will you network with psychiatrists looking to encourage change, but the Mental Health Services Conference will be attended by professionals throughout the mental health care field including primary care physicians, nurse practitioners, social workers, and more.

Join us in person to:

- Recognize and improve mental health disparities in the community
- Provide culturally competent care for diverse populations
- Identify barriers to care, including health service delivery issues
- Practical Psychopharmacology and Addictions updates
- Leadership Track
- Training in behavioral management and de-escalation
- Media Training
- And much, much more

Register today at  
[psychiatry.org/MHSC](https://psychiatry.org/MHSC)

# ▶ PODCASTS from APA Publishing

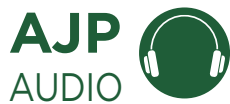

## AJP Audio

Host: Aaron Van Dorn, Online Content Manager

Each episode features an in-depth interview with an author from the most discussed article appearing in the latest issue of *The American Journal of Psychiatry*, along with Editor-in-Chief Ned Kalin highlighting the rest of the issue.

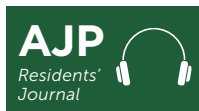

## The American Journal of Psychiatry Residents' Journal

Created by trainees for trainees and featuring interviews covering a wide array of topics including career exploration, personal/professional journeys, clinical practice tips, and more.

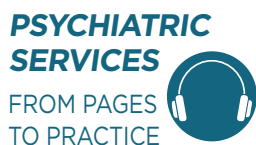

## Psychiatric Services From Pages to Practice

Hosts: Lisa Dixon, M.D., M.P.H., Editor, *Psychiatric Services*, and Josh Berezin, M.D., M.S.

Learn about the latest mental health services research published in *Psychiatric Services* and why it is relevant. Topics include community-based treatment programs, collaborative care, evidence-based treatment and service delivery, criminal and social justice, policy analysis, and more.

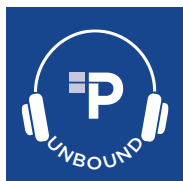

## Psychiatry Unbound

Host: Laura Roberts, M.D., M.A., Editor-in-Chief, APA Publishing Books

APA Publishing's Books podcast offers the opportunity to hear the voices behind the most prominent psychiatric scholarship in the field today. Learn about important topics in the field of psychiatry and see how our authors are making an impact in clinical settings throughout the world.

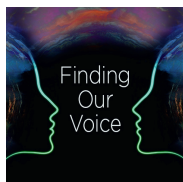

## Finding Our Voice

Host: Sanya Virani, MBBS, MPH

*Finding Our Voice* brings the viewpoints and opinions of the next generation of psychiatrists—including residents, fellows, and early career psychiatrists—to the forefront. Topics covered include systemic racism and social determinants.

Subscribe Today!

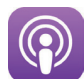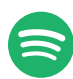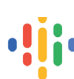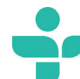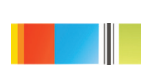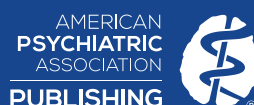

# THE AMERICAN PSYCHIATRIC ASSOCIATION

800 Maine Avenue, S.W., Suite 900, Washington, D.C. 20024

(888) 357-7924 (toll-free inside the U.S. and Canada)

web site: [www.psychiatry.org](http://www.psychiatry.org) • e-mail: [apa@psych.org](mailto:apa@psych.org)

## Chairpersons of Committees, Councils, and Task Forces

### STANDING COMMITTEES

#### Bylaws

Edward R. Herman, J.D., M.D.

#### Elections

Josepha A. Cheong, M.D.

#### Ethics

Charles Dike, M.D.

#### Finance and Budget

Steven S. Sharfstein, M.D.

*Audit:* Richard F. Summers, M.D.

*Investment Oversight:* David Fassler, M.D.

#### Joint Reference

Ramaswamy Viswanathan, M.D., Dr.Med.Sc.

#### Membership

Gail Robinson, M.D.

#### Nominating

Rebecca W. Brendel, M.D., J.D.

#### Tellers

Katherine M. Napalinga, M.D.

### NON-STANDING COMMITTEES

#### Conflict of Interest

Gabrielle L. Shapiro, M.D.

#### Structural Racism Accountability

Kamalika Roy, M.D., M.C.R.

### COUNCILS

#### Council on Addiction Psychiatry

Smita Das, M.D., M.P.H., Ph.D.

#### Council on Advocacy and Government Relations

Katherine G. Kennedy, M.D.

*Advocacy and Litigation Funding:* Patrick Aquino, M.D.

#### Council on Children, Adolescents, and Their Families

Anish R. Dube, M.D., M.P.H.

*Women's Mental Health:* Ludmila B. De Faria, M.D.

#### Council on Communications

Howard Liu, M.D., M.B.A.

#### Council on Consultation-Liaison Psychiatry

Maria L. Tiamson-Kassab, M.D.

#### Council on Geriatric Psychiatry

Daniel C. Dahl, M.D.

#### Council on Healthcare Systems and Financing

Robert L. Trestman, M.D., Ph.D.

*Integrated Care:* Shannon M. Kinnan, M.D.

*RRVRS, Codes and Reimbursement:* Jeremy S. Musher, M.D.

*Reimbursement for Psychiatric Care:* Sander Koyfman, M.D.

#### Council on International Psychiatry and Global Health

Pamela Collins, M.D., M.P.H.

#### Council on Medical Education and Lifelong Learning

Art Walaszek, M.D.

*Innovation:* Steven Chan, M.D., M.B.A.

*Scientific Program:* Eric Williams, M.D.

*Scientific Program—Mental Health Services Conference (Oct. to Oct. tenure):* Lawrence Malak, M.D.

*Vestermark Award Committee:* Donna M. Sudak, M.D.

*Well-Being and Burnout:* Uchenna Okoye, M.D., M.P.H.

#### Council on Minority Mental Health and Health Disparities

Walter Wilson, Jr., M.D.

#### Council on Psychiatry and Law

Richard Martinez, M.D., M.H.

*Judicial Action:* Reena Kapoor, M.D.

#### Council on Quality Care

Carol L. Alter, M.D.

*Mental Health Information Technology:* Darlene R. King, M.D.

*Quality and Performance Measurement:* David S. Kroll, M.D.

*Practice Guidelines:* Daniel J. Anzia, M.D.

*Telepsychiatry:* Shabana Khan, M.D.

#### Council on Research

Jonathan E. Alpert, M.D., Ph.D.

*Climate Change and Mental Health:* Joshua Wortzel, M.D.

*Psychiatric Dimensions of Disasters:* Joshua C. Morganstein, M.D.

# Go Online

Visit [ajp.psychiatryonline.org](http://ajp.psychiatryonline.org) for these features!

## AJP in Advance

*Discover the latest research advances before they appear in print*

### **Must Psilocybin Always “Assist Psychotherapy”?**

The authors discuss key aspects of psychedelic medications, including their use in tandem with psychological interventions. They review the state of the art and highlight major questions that must be addressed before broader use of the medications can be considered.

## AJP Audio and Video

Dr. Luis C. Farhat and Dr. Guilherme V. Polanczyk join AJP Audio to discuss how neurodevelopmental traits, socioenvironmental factors, and emotional dysregulation interact in childhood development (p. 755).

In an issue highlights video, AJP Deputy Editor Danny Pine discusses “Genetic Contribution to the Heterogeneity of Major Depressive Disorder: Evidence From a Sibling-Based Design Using Swedish National Registers” (Nguyen et al., p. 714) and “Maternal Perinatal Stress Trajectories and Negative Affect and Amygdala Development in Offspring” (Marr et al., p. 766)

## AJP CME

You can earn CME credits by reading articles in *The American Journal of Psychiatry*. Three articles in this issue form a short course that consists of reading the article and answering three multiple-choice questions with a single correct answer for up to 1 AMA PRA Category 1 Credit™ each. Credit is issued only to subscribers of the online AJP CME Course Program.

See the list below for articles in this month’s issue that are the subject of a CME quiz.

### **In this issue**

---

Genetic Contribution to the Heterogeneity of Major Depressive Disorder: Evidence From a Sibling-Based Design Using Swedish National Registers (Nguyen et al., p. 714)

---

Networks of Neurodevelopmental Traits, Socioenvironmental Factors, Emotional Dysregulation in Childhood, and Depressive Symptoms Across Development in Two U.K. Cohorts (Farhat et al., p. 755)

---

Maternal Perinatal Stress Trajectories and Negative Affect and Amygdala Development in Offspring (Marr et al., p. 766)

---

@APAPubJournals

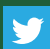

Psychiatry Online

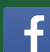

AMERICAN  
PSYCHIATRIC  
ASSOCIATION  
PUBLISHING

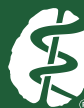

[www.appi.org](http://www.appi.org)  
1-800-368-5777  
[appi@psych.org](mailto:appi@psych.org)



# Update on Attention Deficit Hyperactivity Disorder Through the Lifespan

**SATURDAY, DECEMBER 2, 2023  
VIRTUAL WEBINAR**

**COURSE DIRECTORS**

Lenard A. Adler, MD  
Richard Gallagher, PhD

**SPEAKERS INCLUDE**

Lenard A. Adler, MD  
Rosanna Breaux, PhD  
Richard Gallagher, PhD  
Michael Kofler, PhD  
Beth Krone, PhD

**KEYNOTE SPEAKER**

Timothy E. Wilens, MD

**TARGET AUDIENCE**

Primary Care Physicians, Psychiatrists, Psychologists, Nurses and Social Workers

**TOPICS OF INTEREST**

- Treatment of Substance Use in ADHD
- How to Guide Parents and Patients When Considering Alternative Treatments
- Treatment of Sluggish Cognitive Tempo and Executive Functioning in Adults
- Understanding Executive Function in ADHD: Update on Assessment and Intervention
- Luncheon Ask the Experts Session

This activity has been approved for **AMA PRA Category 1 Credit™**

**WEBSITE AND REGISTRATION**

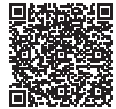

**PSYCHOLOGY CREDITS**

NYU Langone Health/NYU Grossman School of Medicine is recognized by the New York State Education Department's State Board for Psychology as an approved provider of continuing education for Licensed Psychologists #PSY-0085. NYU Langone Health/NYU Grossman School of Medicine designates this event for a maximum of 75 NYS Psychology CE credits. Credits are only available to those who attend the event in its entirety and complete a post-event evaluation.

Provided by NYU Grossman School of Medicine  
Organized by the Departments of Psychiatry and Child and Adolescent Psychiatry at NYU Grossman School of Medicine

## Assistant/Associate/Professor of Clinical Pediatrics /Physician Surgeon/Psychiatry

**Hiring Department:** Pediatrics

**Location:** Peoria, IL USA

**Requisition ID:** 1020638

**Posting Close Date:** 11/16/2023

The University of Illinois College of Medicine at Peoria (UICOMP) seeks physicians for positions at the level of Professor, Associate Professor or Assistant Professor to enhance an important clinical program.

Pediatric Psychiatrist positions require candidates who are BC in Psychiatry and have completed 4 years in residency and 2 years in fellowship training in Pediatric Psychiatry. Candidates with scholarly and research interests are highly desirable, along with experience in teaching medical students and residents.

UICOMP is one of the regional campuses that make up the nation's largest public medical school. The Peoria campus is known among students for its small class sizes, rigorous curriculum and hands-on clerkships; to residents and fellows for the strong academic setting, large referral base and exceptional facilities; and by physicians seeking the ideal combination of teaching and practicing medicine in a research-based university setting.

UICOMP's main clinical partner is OSF Healthcare Children's Hospital of Illinois, a 136-bed, full-service hospital, with physicians in more than 140 subspecialties. Located on the campus of OSF St. Francis Medical Center, it's the pediatric teaching affiliate of UICOMP, the state's only major pediatric teaching hospital outside Chicago—and home to groundbreaking pediatric research in medicine. The hospital is also proud to house the St. Jude Midwest Affiliate, which brings some of the care and services offered by St. Jude in Memphis to central Illinois.

Malpractice insurance is provided by the University of Illinois system and an excellent benefits package is available including vacations, sick time, CME, health and life insurance and retirement plan.

**Position Summary**

Provide outpatient diagnostic and management services for patients in the region with general psychiatric and behavioral needs. Participate in undergraduate, graduate and continuing education program of the Department.

**Duties & Responsibilities**

- The Department of Pediatrics, University of Illinois College of Medicine at Peoria is seeking psychiatrist who has completed a fellowship in Child and Adolescent Psychiatry at the level of Assistant/Associate Professor or Professor.
- Responsibilities – Child Psychiatrist
- Participate in undergraduate, graduate and continuing education program of the Department.
- Provide outpatient diagnostic and management services for patients in the region with general psychiatric and behavioral needs.
- Provide inpatient psychiatric consultation for children and adolescents.
- Organize and conduct research programs in Child Psychiatry.
- Perform other duties of a university faculty member including committee assignments, curriculum development, student counseling, and administration.

**Minimum Qualifications**

- Eligible for licensure in Illinois
- Board Certified in Psychiatry
- Board Certified/Board Eligible in Child and Adolescent Psychiatry

For fullest consideration, please submit your application by 9/6/2023 at:

<https://uic.csod.com/ux/ats/careersite/1/home/requisition/6600?c=uic>

The University of Illinois System is an equal opportunity employer, including but not limited to disability and/or veteran status, and complies with all applicable state and federal employment mandates. Please visit Required Employment Notices and Posters at: <https://www.hr.uillinois.edu/cms/one.aspx?portalId=4292&pageId=5705> to view our non-discrimination statement and find additional information about required background checks, sexual harassment/misconduct disclosures, COVID-19 vaccination requirement, and employment eligibility review through E-Verify.

The University of Illinois conducts background checks on all job candidates upon acceptance of a contingent offer of employment. Background checks will be performed in compliance with the Fair Credit Reporting Act.

As an EOE/AA employer, the University of Illinois encourages applications from individuals regardless of an applicant's race, color, religion, sex, gender identity, sexual orientation, national origin, and Veteran or disability status.

The university provides accommodations to applicants and employees. Request an Accommodation at <https://jobs.uic.edu/request-and-accommodation/>

**PSYCHIATRIC NEWS**

**BRIEF**

## Enable Psychiatric News Brief

With the American Psychiatric Association's new flash briefing, *Psychiatric News Brief*, you can now listen to synopses of curated articles from *Psychiatric News*. Simply enable this skill and you can listen anytime you choose throughout your day by just saying "Alexa, what's my flash briefing" or "Alexa, tell me what's new".

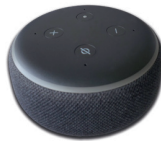

Flash briefing is a customizable Amazon skill that includes updates from your favorite content services. When you say, "Alexa, what's my flash briefing?" or "Alexa, what's the news," you'll hear updates from any organization that you have enabled.

Go to [psychnews.psychiatryonline.org/alexa](https://psychnews.psychiatryonline.org/alexa) to sign up now!

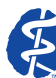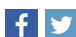

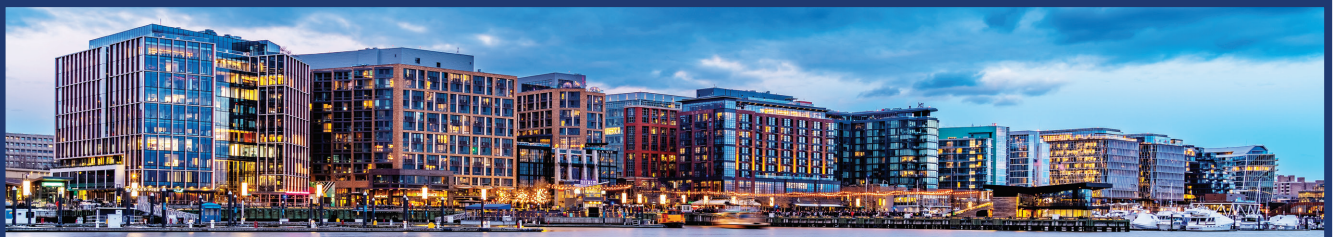

# CEO/Medical Director Search

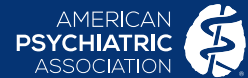

APA seeks a dynamic, strategic leader to serve as the organization's next **Chief Executive Officer and Medical Director**.

The CEO and Medical Director of APA will serve as a national leader for the psychiatric profession at a key moment when the field is in a time of flux. The successful candidate will inherit a strong organization that is well positioned to meet the challenges facing the profession of psychiatry and will leverage APA's role as a convener to provide forums for discussion and idea sharing to meet these challenges.

The next CEO and Medical Director should be a dynamic leader who can work with various constituents, including the Board, staff, and members, to develop and implement a transformational strategy that meets the needs of its members and the moment in time for the profession.

The Board has appointed a search committee and retained Heidrick & Struggles to lead the search for APA's next CEO.

The full position specification, with a full list of responsibilities and criteria for the next CEO and Medical Director, can be found on **APA's website**.

Initial screening of applicants will begin immediately and continue until the position is filled.

**Nominations and applications should be directed to  
[APACEO@heidrick.com](mailto:APACEO@heidrick.com)**

*The APA will not discriminate against any employee or applicant for employment on the basis of race, color, religion, sex (including sexual orientation, gender identity, and pregnancy), national origin, age (40 and older), disability, marital status, and genetic information in accordance with applicable federal, state, or local law.*

*All APA employees are required to be fully vaccinated against COVID-19 with a vaccine approved or authorized by the World Health Organization or U.S. Food and Drug Administration. Proof of vaccination, or having an accommodation request approved by APA, is required.*

See complete position description: [apapsy.ch/apa-ceo-post](https://apapsy.ch/apa-ceo-post)
